# Supplementary material
Source: Elsevier journal article supplement (https://www.sciencedirect.com/science/article/pii/S2254887419300177)
Supplement: mmc1 [file S2254887419300177:mmc1.pdf]

## **Anexo: Encuesta de valoración sobre la tutorización a residentes de Medicina Interna**

**1. ¿En que Comunidad Autónoma trabajas?**

**2. ¿Qué edad tienes?**

**3. ¿Cuántos años hace que eres Tutor de Residentes?**

**4. ¿Cuál es tu sexo?**

**5. ¿Cuál es el número de camas de tu Servicio de Medicina Interna?**

☐ <50 camas      ☐ 50 – 100 camas      ☐ >100 camas

**6. ¿Cuántos Residentes de Medicina Interna hay en tu Centro?**

**7. De éstos, ¿a cuántos tutorizas?**

☐ 5 o menos Residentes      ☐ más de 5 Residentes

**8. Según el número de Residentes de Medicina Interna de su Comunidad Autónoma, piensa que**

☐ Hay demasiados, se debería disminuir el número

☐ Es un número aceptable

☐ Faltan más Residentes

**9. Según el número de Residentes de su CENTRO HOSPITALARIO, considera que**

☐ Hay demasiados, se debería disminuir el número

☐ Es un número aceptable

☐ Faltan más Residentes

**10. Según el número de Residentes a los que tutoriza**

☐ Son demasiados, no cree que pueda llegar a tutorizarlos con completa dedicación

☐ Es un numero aceptable, puede llegar a tutorizarlos pero sin llegar a conocer las peculiaridades de cada uno

☐ Es un numero aceptable, por lo que puede tutorizarlos sin problemas y conocer las peculiaridades de cada uno

**11. ¿Realizas entrevistas periódicas con sus Residentes para conocer sus inquietudes y detectar los problemas en la formación?**

- ☐ No      ☐ Mensuales      ☐ Trimestrales      ☐ Semestrales      ☐ Anuales

**12. Si realiza entrevistas, éstas son**

- ☐ No realizo entrevistas
- ☐ Estructuradas según un guión
- ☐ Espontáneas, sin guión
- ☐ Estructurada, pero con opción de campos abiertos

**13. En estas entrevistas (seleccione varias opciones si lo desea)**

- ☐ No realizo entrevistas
- ☐ Se planifican las rotaciones futuras
- ☐ Se comentan los problemas de las rotaciones pasadas
- ☐ Se detectan problemas ocurridos en Guardias
- ☐ Se comentan problemas personales

**14. ¿Cree que es útil realizar estas entrevistas a los Residentes?**

- ☐ Si      ☐ No

**15. En cuanto a la planificación de las rotaciones**

- ☐ Las planifico yo, hago un calendario personalizado según cada residente
- ☐ Las planifica otro de los tutores pero las personalizo según cada residente
- ☐ Las planifica otro tutor y no las modifico
- ☐ Vienen impuestas por la Unidad Docente
- ☐ Vienen impuestas por el Jefe de Servicio

**16. En cuanto a las Rotaciones de tus Residentes por otros Servicios, cuales crees que son EXCESIVAS**

**17. En cuanto a las Rotaciones de tus Residentes por otros Servicios, cuales crees que son DEFICITARIAS**

**18. ¿Tus residentes realizan Rotaciones Externas?:**

- ☐ Si ☐ No

**19. En cuanto a la elección de las Rotaciones Externas**

- ☐ Las eligen tus residentes y ellos se ponen en contacto con los distintos Centros
- ☐ Las eligen los residentes y tu o el equipo de tutores contactáis con los distintos centros
- ☐ Tú eliges las rotaciones externas y el centro

**20. ¿En qué áreas realizan tus Residentes con más frecuencia más Rotaciones Externas?**

**21. ¿Cuántos meses rotan tus Residentes en Medicina Interna?**

En planta de Hospitalización convencional

En Áreas Específicas

En Consultas Externas

**22. ¿ En qué en Áreas Específicas de Medicina Interna rotan?**

**23. En el tiempo que pasan tus Residentes por la Consulta**

- ☐ Nunca pasan por Consultas
- ☐ Están menos de dos meses, supervisados de forma directa
- ☐ Están más de dos meses, supervisados de forma directa
- ☐ Están menos de dos meses, no supervisados
- ☐ Están más de dos meses, no supervisados

**24. A la hora de preparar una Comunicación a Congresos**

- ☐ Los Residentes preparan las Comunicaciones sin supervisión
- ☐ Los Residentes eligen los temas de las Comunicaciones y los tutores les supervisamos
- ☐ Los Tutores elegimos los temas de las Comunicaciones y las supervisamo

**25. En cuanto a las publicaciones en la Residencia**

- ☐ Motivas a tus Residentes a Publicar, supervisando sus propuestas
- ☐ Haces tus propias publicaciones y cuentas con la ayuda de Residentes para hacerlas
- ☐ Los Residentes hacen sus publicaciones sin ser supervisión

**26. A la hora de preparar una Sesión Clínica en tu servicio**

- ☐ Los Residentes eligen los temas y las preparan sin supervisión
- ☐ Los Residentes eligen los temas y son supervisados por los tutores
- ☐ Los Tutores eligen los temas y supervisan a los Residentes

**27. De cara a que tus Residentes soliciten trabajo después de la Residencia (respuesta múltiple)**

- ☐ Les ayudas a confeccionar su Currículum, haciéndolo lo más atractivo posible
- ☐ Les orientas sobre como solicitar el título de Especialista
- ☐ Les orientas sobre donde deben y como deben ir a solicitar trabajo
- ☐ Ninguna de las anteriores, los residentes se autogestionan sus salidas laborales

**28. ¿Porqué fuiste nombrado tutor?**

- ☐ Tenías interés en la formación, si bien no has realizado ningún curso específico, y te ofreciste
- ☐ Has realizado cursos de formación para Residentes y te ofreciste para ello
- ☐ Fuiste elegido por tu Jefe de Servicio y te pareció bien
- ☐ Fuiste elegido por los Residentes porque les caes bien y te pareció bien
- ☐ Eres tutor por imposición, no es algo que te guste

**29. ¿Has realizado algún curso sobre formación de Residentes?**

- ☐ Si ☐ No

**30. ¿Crees que la forma de evaluar a los Residentes en tu Centro es correcta?**

- ☐ Si ☐ No

**31. ¿Qué métodos de Evaluación de Residentes se utilizan en tu Centro? Respuesta Múltiple**

- ☐ Libro del Residente
- ☐ Portafolio
- ☐ Fichas de Evaluación de Final de Rotación

- ☐ Entrevistas
- ☐ Informe Anual de Residentes
- ☐ Casos Clínicos con respuesta múltiples
- ☐ ECOE
- ☐ Auditoría de Informes Clínicos
- ☐ Entrevistas a pacientes
- ☐ Exámenes escritos y/o orales
- ☐ Observación de procedimientos
- ☐ Interpretación crítica de literatura médica
- ☐ Otros

**32. En tu Centro, ¿realizáis Evaluación de Competencias Clínicas a los Residentes?**

- ☐ Si ☐ No

**33. En tu Centro, ¿realizáis Evaluación de Fundamentos Científicos a los Residentes?**

- ☐ Si ☐ No

**34. En tu Centro, ¿realizáis Evaluación de Comunicación con los pacientes a los Residentes?**

- ☐ Si ☐ No

**35. En tu Centro, ¿realizáis estrategias de autoformación, análisis crítico e investigación a los Residentes?**

- ☐ Si ☐ No

**36. ¿Crees que desde SEMI se deberían realizar cursos de Formación para Tutores?**

- ☐ Si, lo veo apropiado ☐ No, no lo veo necesario
